# Supplementary material for: HIV-1 Capsid-Cyclophilin Interactions Determine Nuclear Import Pathway, Integration Targeting and Replication Efficiency
Source: PubMed Central journal article supplement (PMC3234246; doi:10.1371/journal.ppat.1002439), 2011-12-08

Figure S3

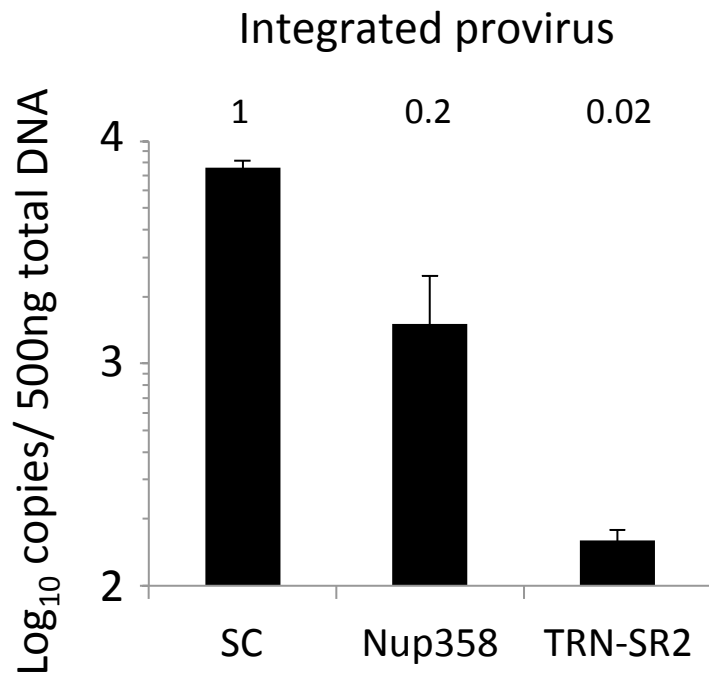

Supplement: ppat.1002439.s003.pdf [file ppat.1002439.s003.pdf]
