# Supplementary material for: HIV-1 Capsid-Cyclophilin Interactions Determine Nuclear Import Pathway, Integration Targeting and Replication Efficiency
Source: PubMed Central journal article supplement (PMC3234246; doi:10.1371/journal.ppat.1002439), 2011-12-08
Supplement: ppat.1002439.s006.pdf [file ppat.1002439.s006.pdf]

Figure S6

|                             | .... .... | .... ....  | .... ....  | .... ....  | .... .... | .... ....  |
|-----------------------------|-----------|------------|------------|------------|-----------|------------|
|                             | 10        | 20         | 30         | 40         | 50        | 60         |
| <b><i>M.mulatta</i></b>     | ETNPVFFDV | CADGEPGRI  | TMELFSNIVP | RTAENFRALC | TGEKGFVK  | SIFHRVIPDF |
| <b><i>H.sapiens</i></b>     | ETNPVFFDV | CADGEPGRI  | TMELFSNIVP | RTAENFRALC | TGEKGFVK  | SIFHRVIPDF |
| <b><i>P.troglodytes</i></b> | ETNPVFFDV | CADGEPGRI  | TMELFSNIVP | RTAENFRALC | TGEKGFVK  | SIFHRVIPDF |
| <b><i>C.familiaris</i></b>  | ETNPVFFDI | CADDEPLGRI | TMELFSNIVP | LTAENFRALC | TGEKGFVK  | SIFHRVIPDY |
| <b><i>B.taurus</i></b>      | ETNPVFFDI | CADDEPLGRI | TMELFSNIVP | KTAENFRALC | TGEKGFVK  | SIFHRVIPDF |
| <b><i>E.caballus</i></b>    | ETNPVFFDV | CADDEPLGRI | TMELFSNIVP | RTAENFRALC | TGEKGFVK  | SVFHRVIPGF |
| <b><i>C.jacchus</i></b>     | ETNPVFFDV | CADSEPLGRI | TMELFSNIVP | RTAENFRALC | TGEKGFVK  | SIFHRVIPDF |
| <b><i>M.musculus</i></b>    | DTNPVFFDV | CADGEPGRI  | IMELFSNIVP | QTAENFRALC | TGEKGFVK  | SIFHRVVPDF |
| <b><i>M.domestica</i></b>   | ETNPVFFDI | FADDEHLGRI | TIELFSNIVP | LTAENFRALC | TGERGFVK  | SVFHRVIPDF |
| <b><i>P.abelii</i></b>      | ETNPVFFDV | CADGEPGRI  | TMELFSNIVP | RTAENFRALC | TGEKGFVK  | SIFHRVIPDF |
| <b><i>O.cuniculus</i></b>   | ETNPVFFDI | CADDEPLGRI | TMELFSNIVP | QTAENFRALC | TGEKGFVK  | SIFHRVIPDC |
| <b><i>R.norvegicus</i></b>  | ETNPVFFDV | CVDGEPGRI  | IMELFSNIVP | QTAENFRALC | TGEKGFVK  | SIFHRVVPDF |

  

|                             | .... ....  | .... ....  | .... ....  | .... ....  | .... ....  | .... ....  |
|-----------------------------|------------|------------|------------|------------|------------|------------|
|                             | 70         | 80         | 90         | 100        | 110        | 120        |
| <b><i>M.mulatta</i></b>     | YQGGDITKH  | DGTGGQSIYG | DKFEDENFDV | KHTGPGLLSM | ANRGQNTNNS | QFFITLKKAE |
| <b><i>H.sapiens</i></b>     | YQGGDITKH  | DGTGGQSIYG | DKFEDENFDV | KHTGPGLLSM | ANQGQNTNNS | QFVITLKKAE |
| <b><i>P.troglodytes</i></b> | YQGGDITKH  | DGTGGQSIYG | DKFEDENFDV | KHTGPGLLSM | ANQGQNTNNS | QFFITLKKAE |
| <b><i>C.familiaris</i></b>  | YQGGDITKH  | DGTGGRSIYG | DKFEDENFDV | KHTGPGLLSM | ANRGRDTNNS | QFFITLKKAE |
| <b><i>B.taurus</i></b>      | YQGGDITKH  | DGTGGRSIYG | DKFEDENFDV | KHTGPGLLSM | ANRGQDTNNS | QFFITLKKAE |
| <b><i>E.caballus</i></b>    | YQGGDITKH  | DGTGGRSIYG | DKFEDENFDV | KHTDPGLLSM | ANRGQDTNNS | QFFIILKKAE |
| <b><i>C.jacchus</i></b>     | YQGGDITKH  | DGTGGQSIYG | DKFEDENFDM | KHTGPGLLSM | ANRGQNTNNS | QFFITLNKAE |
| <b><i>M.musculus</i></b>    | ICQGGDITKH | NGTGGQSIYG | DKFEDENFDL | KHTGPGLLSM | ANYGQNTNNS | QFFITLKKAE |
| <b><i>M.domestica</i></b>   | ICQGGDITKH | DGTGGRSIYG | NTFEDENFTV | RHTGPGLLSM | ANRGRDTNNS | QFFILLKKAE |
| <b><i>P.abelii</i></b>      | YQGGDITKH  | DGTGGQSIYG | DKFEDENFDV | KHGGPGLLSM | ANQGQNTNNS | QFFITLRKAE |
| <b><i>O.cuniculus</i></b>   | ICQGGDITKH | DGTGGKSIYG | DKFEDENFDV | KHTGPGLLSM | ANRGPNTNNS | QFFITLKKAE |
| <b><i>R.norvegicus</i></b>  | ICQGGDITKY | NGTGGQSIYG | DKFEDENFDL | KHTGPGLLSM | ANCGQNTNNS | QFFITLKKAE |

  

|                             | .... ....  | .... ....  | .... ....  | .... ....  | .... |
|-----------------------------|------------|------------|------------|------------|------|
|                             | 130        | 140        | 150        | 160        |      |
| <b><i>M.mulatta</i></b>     | HLDFKHVVFG | FVKDGMDTVK | KIESFGSPKG | SVCRRITITE | CGQI |
| <b><i>H.sapiens</i></b>     | HLDFKHVVFG | FVKDGMDTVK | KIESFGSPKG | SVCRRITITE | CGQI |
| <b><i>P.troglodytes</i></b> | LLDFKHVVFG | FVKDGMDTVK | KIESFGSPKG | SVCRRITITE | CGQI |
| <b><i>C.familiaris</i></b>  | HLDFKHVVFG | FVKDGMDTVK | KIESFGSPKG | SVSRRISITE | CGQI |
| <b><i>B.taurus</i></b>      | RLDFKHVVFG | FVKDGMDTVK | KIESFGSPKG | SVSRRIIITE | CGQI |
| <b><i>E.caballus</i></b>    | HLDLKHVVFG | FVKDGMDTVK | KIESFGSLEG | SVSRRISITE | CGQI |
| <b><i>C.jacchus</i></b>     | HLDFKHVVFG | YVKDGMDTVK | KIESFGSPKG | SVGRRIAITE | CGQI |
| <b><i>M.musculus</i></b>    | HLDFKHVVFG | FVKDGMDTV  | KIESFGSPKG | SVSRRICITE | CGQL |
| <b><i>M.domestica</i></b>   | HLDFKHVVFG | FVKDGMDTVK | KIESFGSPKG | LVSKRIMITE | CGQI |
| <b><i>P.abelii</i></b>      | HLDFKHVVFG | FVKDGMDTVK | KIESFGSPKG | SVCRRITITE | CGQI |
| <b><i>O.cuniculus</i></b>   | HLDFKHVVFG | FVKDGMDTVK | KIESFGSPKG | SVSRRISITE | CGQI |
| <b><i>R.norvegicus</i></b>  | HLDFKHVVFG | FVKDGMDTV  | KIESFGSPKG | SVSRRICITE | CGQL |
