# Supplementary material for: HIV-1 Capsid-Cyclophilin Interactions Determine Nuclear Import Pathway, Integration Targeting and Replication Efficiency
Source: PubMed Central journal article supplement (PMC3234246; doi:10.1371/journal.ppat.1002439), 2011-12-08

Figure S7

**A**

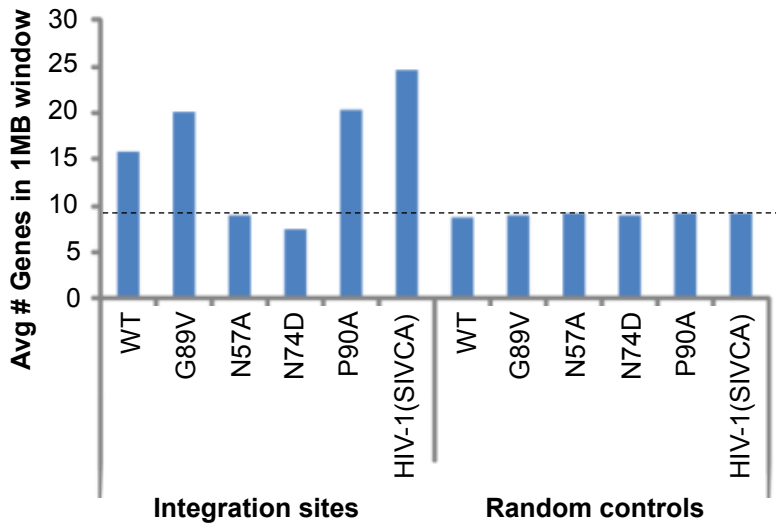

**B**

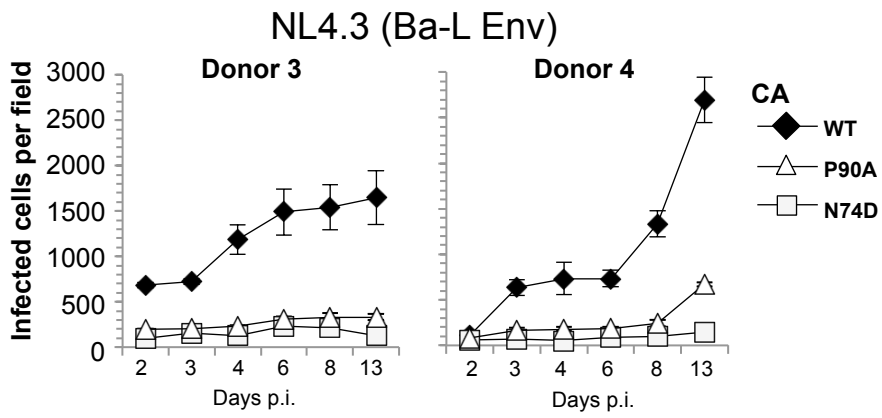

Supplement: ppat.1002439.s007.pdf [file ppat.1002439.s007.pdf]
