# Supplementary material for: HIV-1 Capsid-Cyclophilin Interactions Determine Nuclear Import Pathway, Integration Targeting and Replication Efficiency
Source: PubMed Central journal article supplement (PMC3234246; doi:10.1371/journal.ppat.1002439), 2011-12-08
Supplement: ppat.1002439.s010.pdf [file ppat.1002439.s010.pdf]

Table S1

|              | Fold reduction by AC treatment |                    |                     | Fold reduction by Nup358 RNAi |           | Fold reduction by TRN-SR2 RNAi |           |
|--------------|--------------------------------|--------------------|---------------------|-------------------------------|-----------|--------------------------------|-----------|
|              | <i>Control RNAi</i>            | <i>Nup358 RNAi</i> | <i>TRN-SR2 RNAi</i> | <i>No drug</i>                | <i>AC</i> | <i>No drug</i>                 | <i>AC</i> |
| <b>HIV-1</b> |                                |                    |                     |                               |           |                                |           |
| <b>WT</b>    | 2.12                           | 2.35               | 1.00                | 5.70                          | 6.31      | 7.70                           | 3.65      |
| <b>G89V</b>  | 1.22                           | 0.98               | 1.16                | 1.52                          | 1.23      | 4.05                           | 3.84      |
| <b>P90A</b>  | 1.29                           | 1.02               | 0.88                | 1.38                          | 1.09      | 4.62                           | 3.15      |
| <b>N74D</b>  | 0.94                           | 0.97               | 1.37                | 1.18                          | 1.22      | 1.13                           | 1.64      |
| <b>N57A</b>  | 31.64                          | 129.09             | 73.48               | 0.94                          | 3.82      | 0.99                           | 2.29      |
